# Supplementary material for: Delays in the post-marketing withdrawal of drugs to which deaths have been attributed: a systematic investigation and analysis
Source: PubMed Central journal article supplement (PMC4318389; doi:10.1186/s12916-014-0262-7), 2015-02-05
Supplement: 12916_2014_262_MOESM1_ESM.pdf [file 12916_2014_262_MOESM1_ESM.pdf]

**Appendix 1:** Medline search strategy for identification of report dates for first report of death, first date of withdrawal

“[Drug name]” AND “fatal\*”

“[Drug name]” AND “fatality”

“[Drug name]” AND “death”

“[Drug name]” AND “toxicity”

“[Drug name]” AND “adverse”

“[Drug name]” AND “withdrawal”

“[Drug name]” AND “withdrawn”

“[Drug name]” AND “recall”

“[Drug name]” AND “voluntary recall”

“[Drug name]” AND “banned”

“[Drug name]” AND “prohibited”

[Sort by Publication date]
