# Supplementary material for: Delays in the post-marketing withdrawal of drugs to which deaths have been attributed: a systematic investigation and analysis
Source: PubMed Central journal article supplement (PMC4318389; doi:10.1186/s12916-014-0262-7), 2015-02-05
Supplement: 12916_2014_262_MOESM2_ESM.pdf [file 12916_2014_262_MOESM2_ESM.pdf]

**Table 1: Medicinal products withdrawn because of drug-attributed deaths**

| Medicinal product          | Launch year | First death reported | Year first withdrawn* | Countries of withdrawal**                                                              | Death attributed to           | Level of evidence <sup>§</sup> |
|----------------------------|-------------|----------------------|-----------------------|----------------------------------------------------------------------------------------|-------------------------------|--------------------------------|
| Alosetron                  | 2000        | 2000                 | 2000                  | USA; re-introduced with restrictions in 2002                                           | Ischaemic colitis             | 4                              |
| Alpidem                    | 1991        | 1994                 | 1994                  | France                                                                                 | Hepatotoxicity                | 4                              |
| Aminophenazone             | 1887        | 1936                 | 1965                  | 10 European, 14 Asian, & 4 African countries; Australia; USA; Chile; Brazil; Venezuela | Agranulocytosis               | 4                              |
| Amobarbital <sup>¶</sup>   | 1961        | 1979                 | 1985                  | Sweden                                                                                 | Respiratory depression        | 4                              |
| Aprobarbital <sup>¶</sup>  | 1920        | 1966                 | 1985                  | Sweden                                                                                 | Respiratory depression        | 4                              |
| Azaribine                  | 1975        | 1976                 | 1976                  | USA; Thailand; Mauritius; Saudi Arabia; Venezuela                                      | Thromboembolism               | 4                              |
| Beclobrate                 | 1985        | 1990                 | 1990                  | Switzerland                                                                            | Hepatotoxicity                | 4                              |
| Benoxaprofen               | 1980        | 1982                 | 1982                  | Worldwide                                                                              | GI haemorrhage                | 4                              |
| Benzarone                  | 1964        | 1992                 | 1992                  | Germany                                                                                | Hepatotoxicity                | 4                              |
| Bicalutamide (150 mg)      | 1995        | 2001                 | 2003                  | Canada, UK                                                                             | “Accelerated deaths”          | 2                              |
| Bismuth salts              | 1875        | 1930                 | 1978                  | France; Egypt; Japan; Greece; Austria; Bangladesh                                      | Cardiotoxicity, neurotoxicity | 4                              |
| Boric acid and borates     | 1875        | 1945                 | 1981                  | Ireland; Malaysia                                                                      | Neurotoxicity                 | 4                              |
| Bromocriptine mesylate     | 1976        | 1995                 | 1994                  | USA                                                                                    | Cardiotoxicity, neurotoxicity | 4                              |
| Bromfenac Na               | 1997        | 1998                 | 1998                  | USA; Saudi Arabia                                                                      | Hepatotoxicity                | 4                              |
| Buformin                   | 1957        | 1976                 | 1978                  | Germany; Belgium; Ireland; Austria                                                     | Metabolic acidosis            | 4                              |
| Bunamiodyl                 | 1958        | 1962                 | 1964                  | USA, Sweden                                                                            | Nephrotoxicity                | 4                              |
| Buprenorphine <sup>¶</sup> | 1978        | 1991                 | 1986                  | Egypt                                                                                  | Respiratory depression        | 4                              |
| Celecoxib                  | 1999        | 2006                 | 2011                  | European Union                                                                         | Cardiotoxicity                | 1                              |
| Cerivastatin               | 1990        | 1998                 | 2001                  | Worldwide                                                                              | Rhabdomyolysis; renal failure | 4                              |
| Cianidanol                 | 1976        | 1985                 | 1988                  | Worldwide                                                                              | Haemolytic anemia             | 4                              |
| Cisapride monohydrate      | 1993        | 1993                 | 2000                  | USA; UK; Canada; Philippines; Mauritius; Brunei; Armenia                               | Cardiotoxicity                | 4                              |
| Clometacin                 | 1977        | 1981                 | 1987                  | France                                                                                 | Hepatotoxicity                | 4                              |
| Clozapine                  | 1972        | 1975                 | 1975                  | USA; Finland                                                                           | Agranulocytosis               | 4                              |
| Coumarin (synthetic)       | 1996        | 1996                 | 1996                  | France; Australia                                                                      | Hepatotoxicity                | 4                              |
| Dextropropoxyphene +       | 1978        | 1987                 | 2005                  | UK                                                                                     | Hepatotoxicity                | 4                              |

|                                        |      |      |      |                                                                             |                                     |     |
|----------------------------------------|------|------|------|-----------------------------------------------------------------------------|-------------------------------------|-----|
| paracetamol (co-proxamol) <sup>¶</sup> |      |      |      |                                                                             |                                     |     |
| Dibenzepin hydrochloride <sup>¶</sup>  | 1968 | 1973 | 1983 | Sweden                                                                      | Cardiotoxicity                      | 4   |
| Diododiethyltin & isolinoleic ester    | 1954 | 1955 | 1957 | France                                                                      | Cerebral edema                      | 4   |
| Dithiazanine iodide                    | 1959 | 1960 | 1964 | USA; France; Chad; Italy; Cuba                                              | Metabolic acidosis                  | 4   |
| Domperidone (Inj)                      | 1979 | 1982 | 1985 | Worldwide                                                                   | Cardiotoxicity                      | 4   |
| Doxycycline (IV)                       | 1960 | 1984 | 1989 | France                                                                      | Anaphylaxis                         | 4   |
| Ebrotidine                             | 1997 | 1997 | 1998 | Spain; Peru                                                                 | Hepatotoxicity                      | 4   |
| Encainide                              | 1980 | 1991 | 1991 | UK                                                                          | Cardiotoxicity                      | 4   |
| Ethyl nitrite                          | 1850 | 1977 | 1980 | USA                                                                         | Methaemoglobinemia                  | 4   |
| Felbamate                              | 1993 | 1993 | 1994 | USA, European Union                                                         | Hepatotoxicity; aplastic anaemia    | 2&4 |
| Fenclofenac                            | 1978 | 1984 | 1985 | Worldwide                                                                   | Toxic epidermal necrolysis          | 4   |
| Fenoterol                              | 1971 | 1987 | 1990 | New Zealand                                                                 | Increased mortality due to asthma   | 3   |
| Fipexide                               | 1973 | 1992 | 1991 | France                                                                      | Hepatotoxicity                      | 4   |
| Flosequinan                            | 1992 | 1992 | 1993 | UK                                                                          | Cardiotoxicity                      | 2   |
| Grepafloxacin                          | 1997 | 1999 | 1999 | Worldwide                                                                   | Cardiotoxicity                      | 2&4 |
| Heptabarb <sup>¶</sup>                 | 1956 | 1984 | 1984 | Sweden                                                                      | Respiratory depression              | 4   |
| Hexobarbital <sup>¶</sup>              | 1945 | 1962 | 1984 | Sweden                                                                      | Respiratory depression              | 4   |
| Indoprofen                             | 1976 | 1982 | 1983 | Worldwide                                                                   | Gastrointestinal hemorrhage         | 4   |
| Isaxonine phosphate                    | 1981 | 1983 | 1984 | France                                                                      | Hepatotoxicity                      | 4   |
| Isoxicam                               | 1983 | 1985 | 1985 | Worldwide                                                                   | Fatal skin reactions                | 4   |
| Ketorolac injection                    | 1990 | 1993 | 1993 | Germany; France                                                             | Gastrointestinal hemorrhage         | 4   |
| Loperamide (syrups & drops)            | 1975 | 1989 | 1990 | Worldwide                                                                   | Paralytic ileus                     | 4   |
| L-tryptophan                           | 1963 | 1989 | 1989 | Worldwide                                                                   | Eosinophilia-myalgia syndrome (EMS) | 3   |
| Metamizole                             | 1921 | 1952 | 1974 | 7 European and 11 Asian countries; Australia; USA; Ghana; Zimbabwe; Morocco | Agranulocytosis                     | 4   |
| Mibefradil                             | 1997 | 1998 | 1998 | USA; UK; Peru; South Africa; Jamaica; Bulgaria; Armenia                     | Drug interactions                   | 4   |
| Muzolimine                             | 1985 | 1987 | 1987 | Worldwide                                                                   | Nephrotoxicity                      | 4   |
| Naftidrofuryl oxalate IV               | 1984 | 1994 | 1995 | France; Germany; restricted in the UK                                       | Anaphylaxis                         | 4   |
| Nebacumab                              | 1991 | 1993 | 1993 | Worldwide                                                                   | “Accelerated deaths”                | 2   |

|                                |      |      |      |                                                                                |                                           |       |
|--------------------------------|------|------|------|--------------------------------------------------------------------------------|-------------------------------------------|-------|
| Nefazodone                     | 1994 | 2002 | 2003 | European Union; Canada; Singapore                                              | Hepatotoxicity                            | 4     |
| Nimesulide                     | 1986 | 2000 | 2002 | Ireland; Israel; Bangladesh; Spain                                             | Hepatotoxicity                            | 4     |
| Nitrefazole                    | 1980 | 1984 | 1984 | Germany; Austria                                                               | Hepatotoxicity                            | 4     |
| Nomifensine                    | 1976 | 1985 | 1986 | Worldwide                                                                      | Haemolytic anaemia                        | 4     |
| Orgotein                       | 1968 | 1990 | 1990 | Switzerland; Germany; Portugal                                                 | Anaphylaxis                               | 4     |
| Osmosin                        | 1975 | 1983 | 1983 | UK                                                                             | Adherence to intestinal wall              | 4     |
| Oxomemazine                    | 1937 | 1979 | 1991 | European Union; USA                                                            | Respiratory depression in children (SIDS) | 4     |
| Oxyphenbutazone                | 1955 | 1974 | 1984 | Worldwide                                                                      | Bone marrow suppression                   | 4     |
| Oxyphenisatine acetate         | 1955 | 1972 | 1970 | Worldwide                                                                      | Hepatotoxicity                            | 4     |
| Pemoline                       | 1975 | 1989 | 2005 | Worldwide                                                                      | Hepatotoxicity                            | 4     |
| Pentobarbital <sup>¶</sup>     | 1930 | 1953 | 1985 | Sweden                                                                         | Respiratory depression                    | 4     |
| Phenformin HCl                 | 1957 | 1963 | 1970 | 14 European & 3 Asian countries; Canada; New Zealand; Brazil; USA; Ethiopia    | Metabolic acidosis                        | 4     |
| Phenobarbital <sup>¶</sup>     | 1912 | 1929 | 1985 | Sweden                                                                         | Respiratory depression                    | 4     |
| Phenylbutazone                 | 1949 | 1953 | 1984 | 6 European, 6 Asian & 3 African countries; Chile                               | Bone marrow suppression                   | 4     |
| Pirprofen                      | 1982 | 1986 | 1990 | Worldwide                                                                      | Hepatotoxicity                            | 4     |
| Practolol                      | 1970 | 1977 | 1994 | Germany; Norway; Venezuela                                                     | Hypersensitivity                          | 4     |
| Prenylamine                    | 1960 | 1988 | 1989 | Worldwide                                                                      | Cardiotoxicity                            | 4     |
| Pumactant                      | 1992 | 2000 | 2000 | UK                                                                             | “Accelerated deaths”                      | 2     |
| Rapacuronium bromide           | 1999 | 2000 | 2001 | USA                                                                            | Bronchospasm                              | 4     |
| Rofecoxib                      | 1999 | 2002 | 2004 | Worldwide                                                                      | Cardiotoxicity                            | 1     |
| Rosiglitazone                  | 1999 | 2007 | 2011 | UK; New Zealand; South Africa                                                  | Cardiotoxicity                            | 1,2,3 |
| Sertindole                     | 1996 | 1996 | 1998 | UK, Bulgaria                                                                   | Cardiotoxicity                            | 2     |
| Sibutramine                    | 2001 | 2002 | 2010 | European Union; 4 Asian countries; Australia; Canada; Mexico; New Zealand; USA | Cardiotoxicity                            | 4     |
| Sitaxentan sodium              | 2006 | 2002 | 2010 | Worldwide                                                                      | Hepatotoxicity                            | 4     |
| Somatropin (pituitary-derived) | 1973 | 1985 | 1985 | Cyprus; Ireland; UK; Egypt; Turkey; New Zealand; Netherlands; USA; Oman        | Creutzfeldt-Jakob disease                 | 4     |
| Sorivudine                     | 1993 | 1993 | 1993 | Germany; Japan                                                                 | Interaction with 5-fluorouracil           | 4     |
| Suloctidil                     | 1975 | 1983 | 1985 | Worldwide                                                                      | Hepatotoxicity                            | 4     |

|                                       |      |      |      |                                                                             |                        |     |
|---------------------------------------|------|------|------|-----------------------------------------------------------------------------|------------------------|-----|
| Technetium (99mTc) fanolesomab        | 2004 | 2005 | 2005 | USA                                                                         | Cardiotoxicity         | 4   |
| Temafloxacin                          | 1991 | 1992 | 1992 | Worldwide                                                                   | Haemolytic anaemia     | 4   |
| Temazepam (gel capsules) <sup>¶</sup> | 1969 | 1992 | 2004 | Australia                                                                   | Respiratory depression | 3   |
| Terfenadine                           | 1985 | 1991 | 1997 | 3 European, 2 African, 2 Asian & 3 South American countries; USA            | Cardiotoxicity         | 4   |
| Terodiline                            | 1965 | 1989 | 1991 | Worldwide                                                                   | Cardiotoxicity         | 4   |
| Thenalidine                           | 1953 | 1958 | 1958 | USA; UK; Sweden; France; Cyprus; Australia; Finland; Norway                 | Neutropenia            | 4   |
| Tienilic acid                         | 1976 | 1980 | 1980 | Greece; Philippines; USA; Brazil; Germany; Panama; France; India; Venezuela | Hepatotoxicity         | 4   |
| Tolcapone                             | 1998 | 1998 | 1998 | UK; Australia; Ireland; Spain; Portugal; Lithuania; Bulgaria                | Hepatotoxicity         | 4   |
| Tolrestat                             | 1982 | 1995 | 1996 | Worldwide                                                                   | Hepatotoxicity         | 2   |
| Torcetrapib                           | 1999 | 2006 | 2006 | Worldwide                                                                   | Cardiotoxicity         | 2   |
| Troglitazone                          | 1997 | 1997 | 1997 | UK; Switzerland; Peru                                                       | Hepatotoxicity         | 4   |
| Trovafloxacin                         | 1997 | 1996 | 1999 | European Union; Philippines; Syria                                          | Hepatotoxicity         | 2&4 |
| Vinbarbital <sup>¶</sup>              | 1939 | 1975 | 1984 | Sweden                                                                      | Respiratory depression | 4   |
| Vitamin E (IV)                        | 1983 | 1984 | 1984 | USA                                                                         | Hepatotoxicity         | 4   |
| Zipeprol HCl <sup>¶</sup>             | 1982 | 1991 | 1993 | Brazil; Philippines                                                         | Respiratory depression | 4   |
| Zomepirac Na                          | 1979 | 1983 | 1983 | Worldwide                                                                   | Anaphylaxis            | 4   |

\*For any reason; some drugs have been withdrawn for one or more indications but not for others

<sup>†</sup>The European Union refers to the European Medicines Agency member states; European, African, Asian, or South American countries refers to nations geographically located in these regions

<sup>‡</sup>Worldwide = in all countries in which it was marketed

<sup>¶</sup>Drugs withdrawn because of fatal intoxication

<sup>§</sup>Based on the Oxford Centre for Evidence-Based Medicine Levels of Evidence. Level 1: Systematic review of randomized trials, systematic review of nested case-control studies, Level 2: Individual randomized trial or (exceptionally) observational study with dramatic effect; Level 3: Non-randomized controlled cohort/follow-up study (post-marketing surveillance); Level 4: Case-series, case-control, or historically controlled studies; Level 5: Mechanism-based reasoning
